# Supplementary material for: GPAT3 regulates the synthesis of lipid intermediate LPA and exacerbates Kupffer cell inflammation mediated by the ERK signaling pathway
Source: PubMed Central journal article supplement (PMC10039030; doi:10.1038/s41419-023-05741-z), 2023-03-24

Figure 1

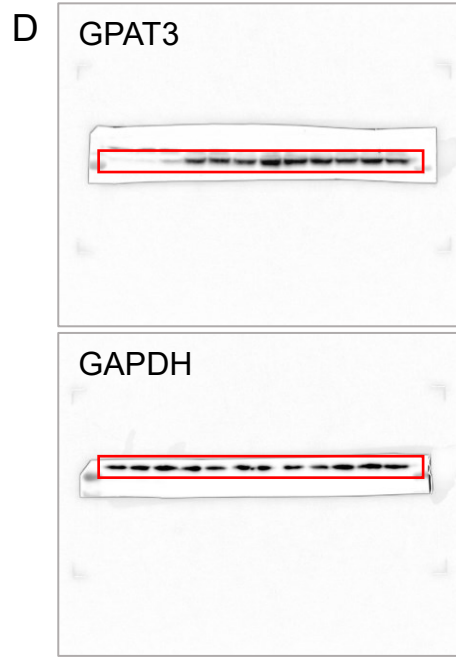

Figure 2

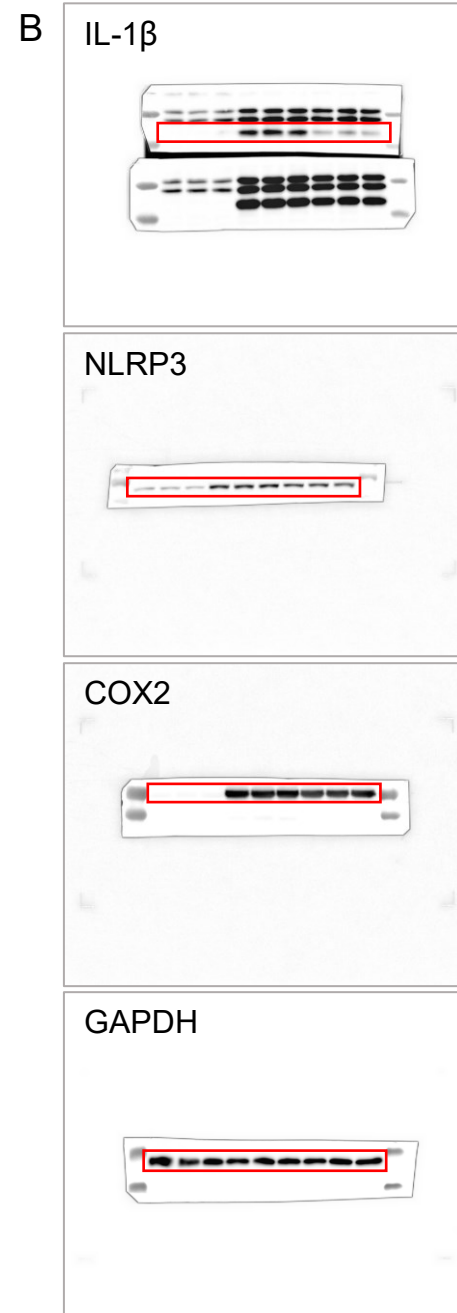

Figure 5

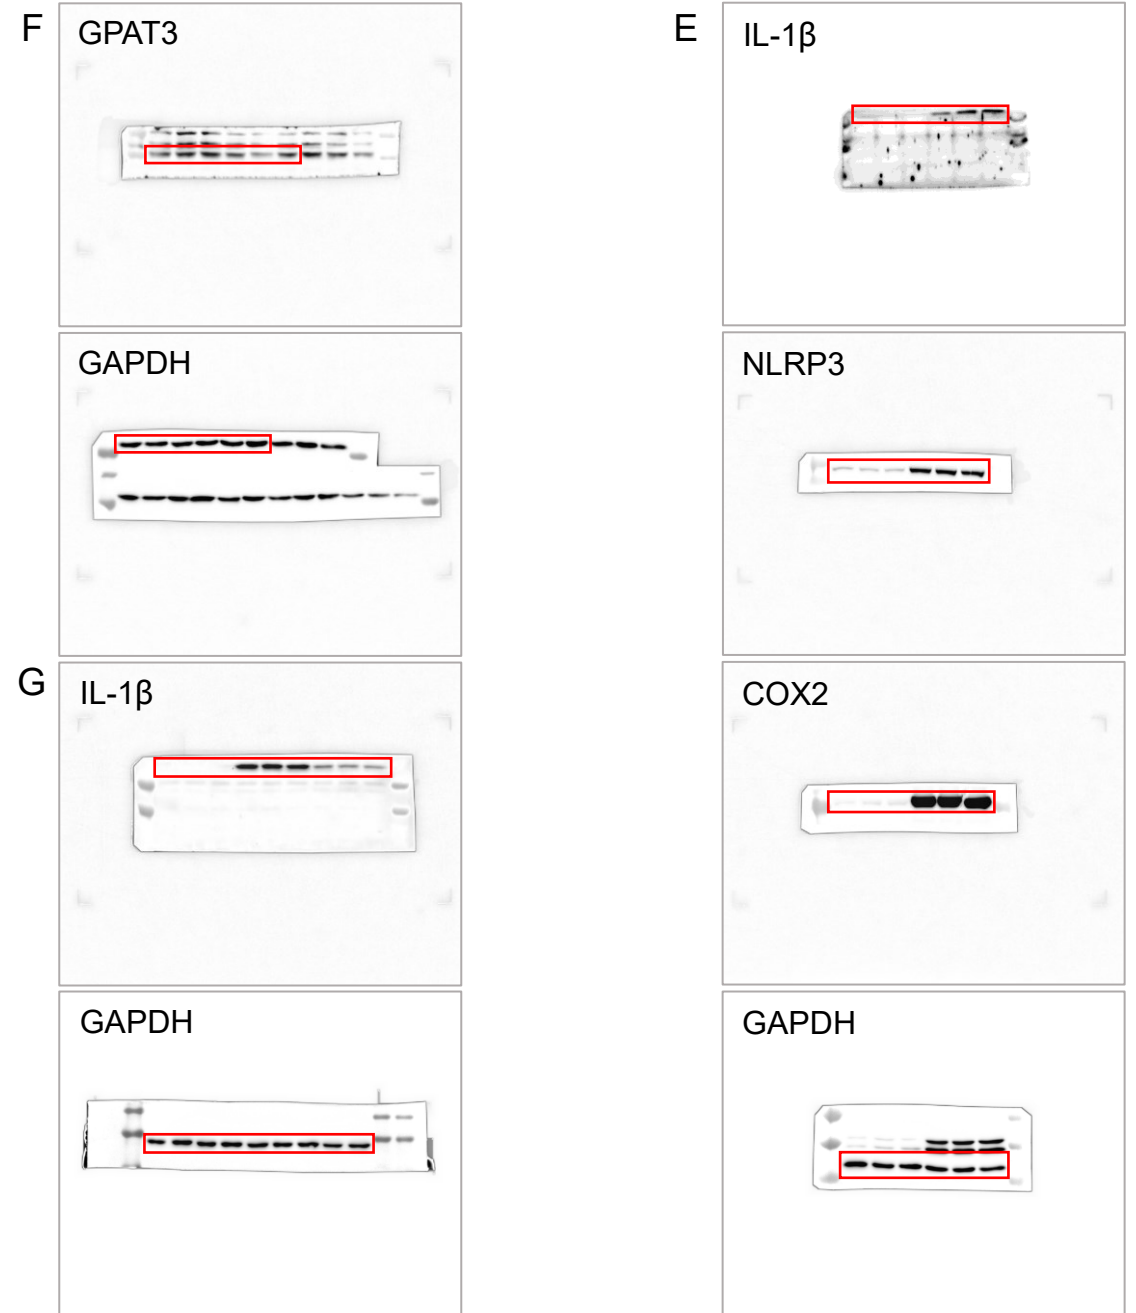

Figure 6

B

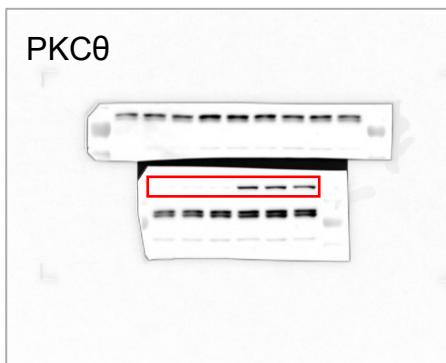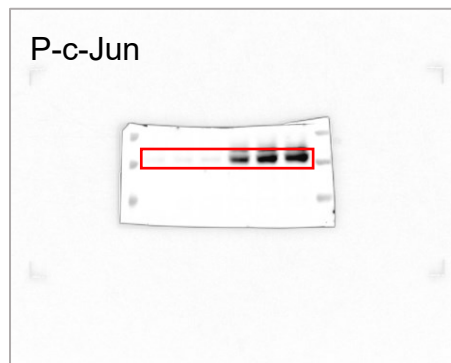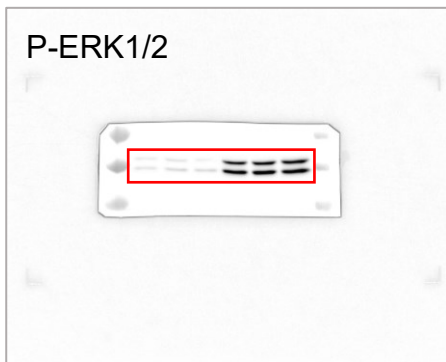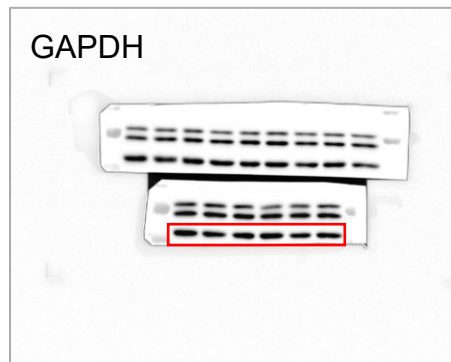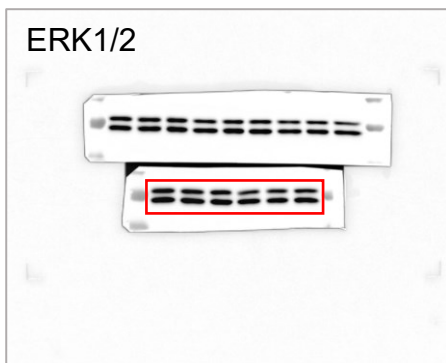

C

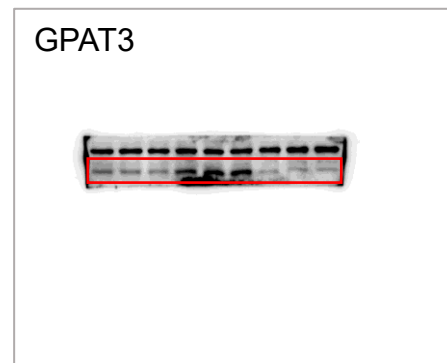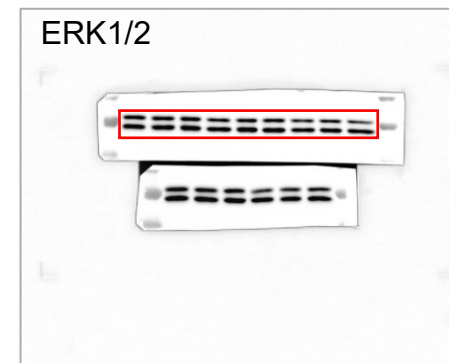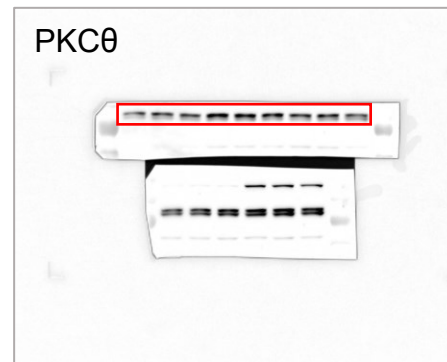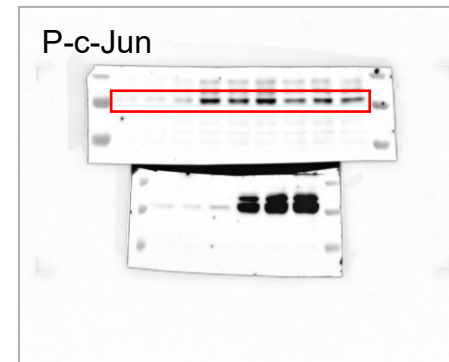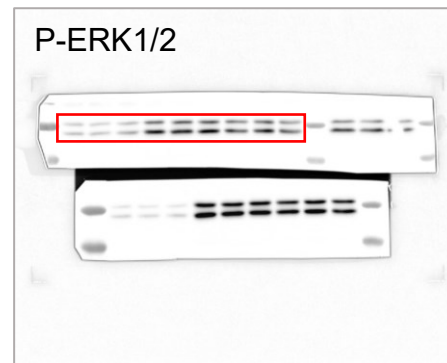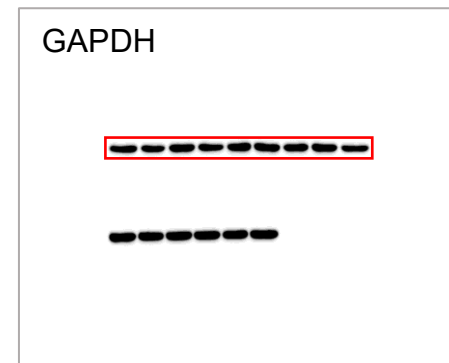

Figure 6 D

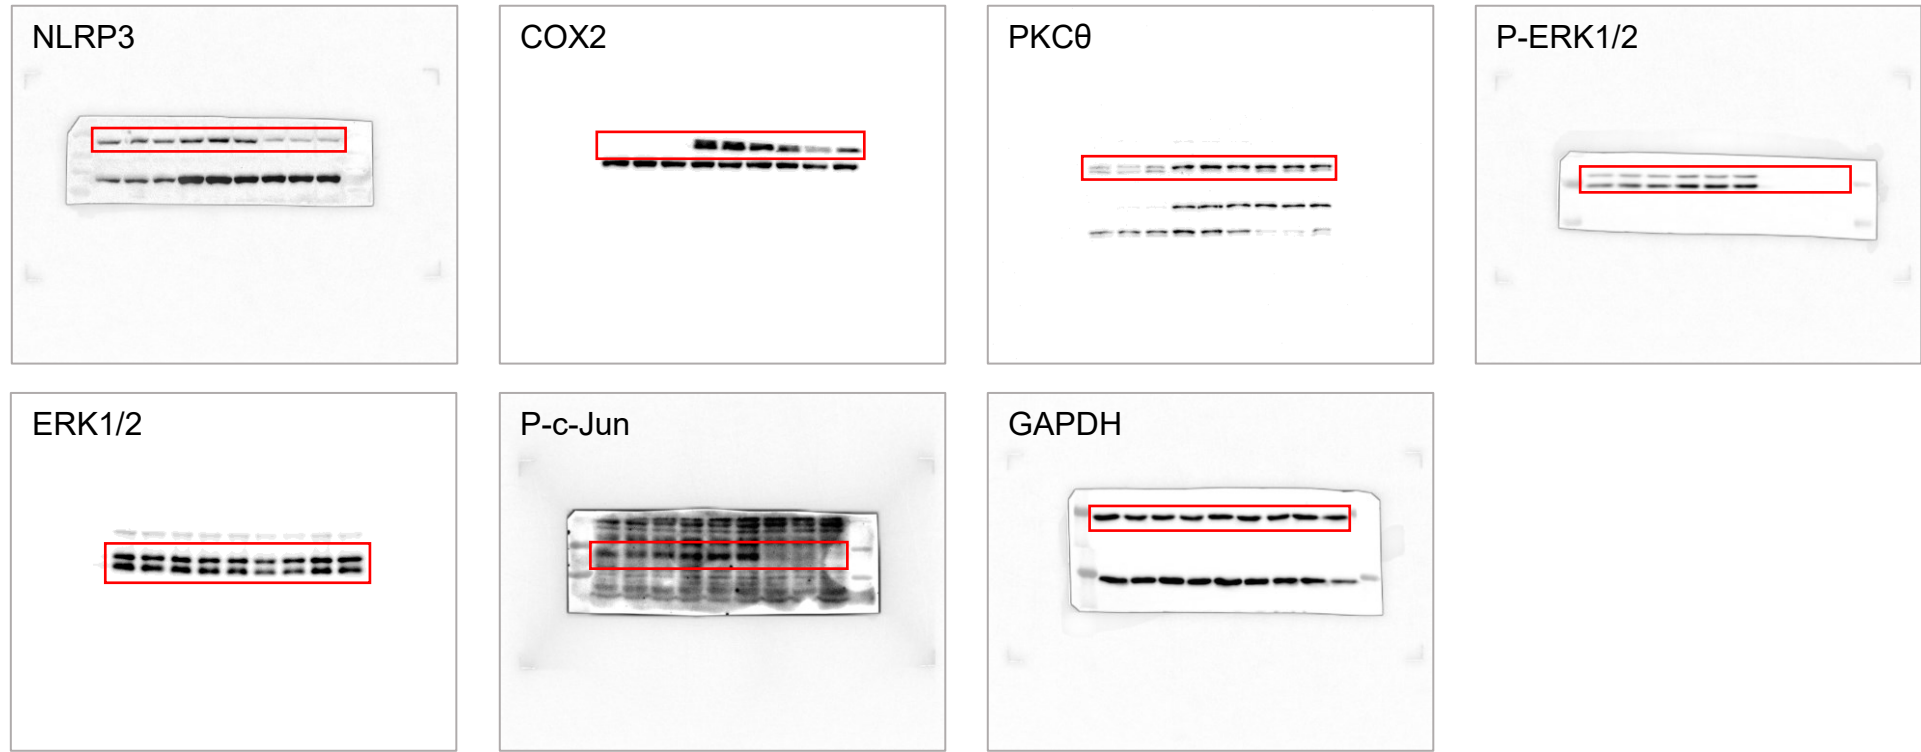

Figure S2 B

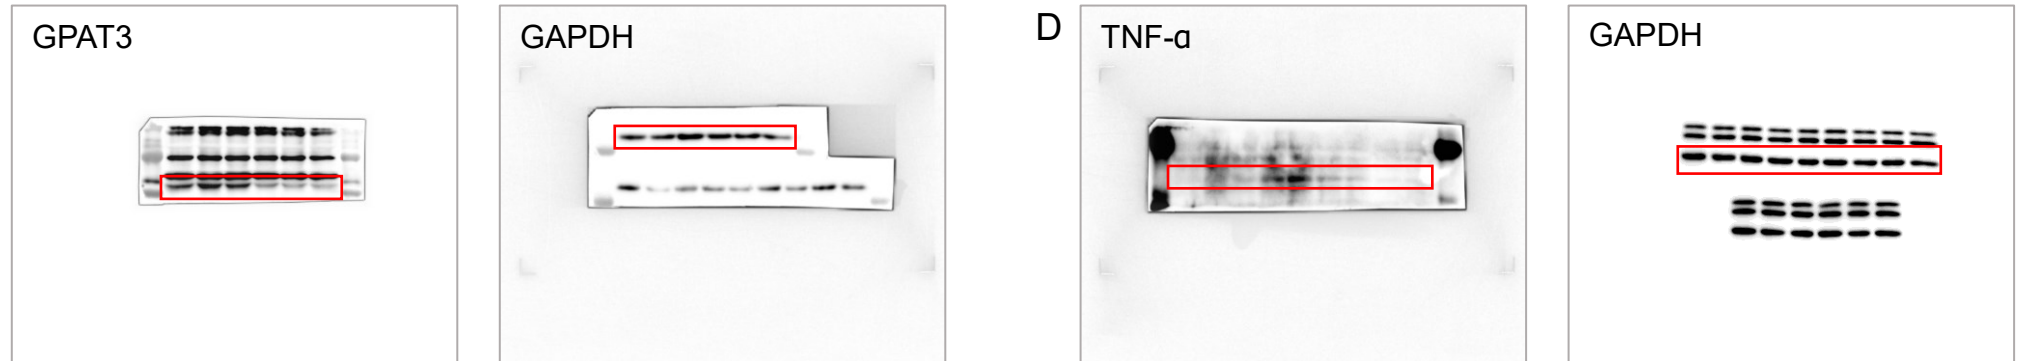

Supplement: 41419_2023_5741_MOESM7_ESM.pdf [file 41419_2023_5741_MOESM7_ESM.pdf]
